# Supplementary material
Source: publisher figshare collection journal article supplement (https://acs.figshare.com/ndownloader/files/5335618)
Supplement: Supplementary file 1 [file 5335618]

data_shi
#====================================================================

# 1. SUBMISSION DETAILS

_publ_contact_author       
;
      Shi,Zhan
      College of Chemistry
      Jilin University
      Changchun, 130012
      P. R. China
;
_publ_contact_author_phone  '86-431-85168317'
_publ_contact_author_fax    '86-431-85168624'
_publ_contact_author_email  'zshi@mail.jlu.edu.cn'
_publ_requested_journal     'Crystal Growth & Design'
_publ_requested_coeditor_name     ?

#==========================================================================

# 3. TITLE AND AUTHOR LIST

_publ_section_title
;
Hydrothermal Synthesis and Crystal Structure of Polar and Nonpolar Compounds
in Indium Iodate Family
;

loop_
 _publ_author_name
 _publ_author_address
     'Liu, Xiaomin'
;     College of Chemistry
      Jilin University
      Changchun, 130012
      P. R. China
;
     'Li, Guanghua'
;     College of Chemistry
      Jilin University
      Changchun, 130012
      P. R. China
;
     'Hu, Yawei'
;     College of Chemistry
      Jilin University
      Changchun, 130012
      P. R. China
;
     'Shi, Zhan'
;     College of Chemistry
      Jilin University
      Changchun, 130012
      P. R. China
;
     'Feng, Shouhua'
;     College of Chemistry
      Jilin University
      Changchun, 130012
      P. R. China
;
#============================================================  
data_compound1
 
_audit_creation_method            SHELXL-97 
_chemical_name_systematic 
; 
 ? 
; 
_chemical_name_common             ? 
_chemical_melting_point           'not measured' 
_chemical_formula_moiety          'I6 In K3 O18' 
_chemical_formula_sum 
 'I6 In K3 O18' 
_chemical_formula_weight          1281.52 
 
loop_ 
 _atom_type_symbol 
 _atom_type_description 
 _atom_type_scat_dispersion_real 
 _atom_type_scat_dispersion_imag 
 _atom_type_scat_source 
 'O'  'O'   0.0106   0.0060 
 'International Tables Vol C Tables 4.2.6.8 and 6.1.1.4' 
 'K'  'K'   0.2009   0.2494 
 'International Tables Vol C Tables 4.2.6.8 and 6.1.1.4' 
 'In'  'In'  -0.7276   1.3100 
 'International Tables Vol C Tables 4.2.6.8 and 6.1.1.4' 
 'I'  'I'  -0.4742   1.8119 
 'International Tables Vol C Tables 4.2.6.8 and 6.1.1.4' 
 
_symmetry_cell_setting            Orthorhombic 
_symmetry_space_group_name_H-M    Fdd2 
_symmetry_space_group_name_Hall   F2-2d  
 
loop_ 
 _symmetry_equiv_pos_as_xyz 
 'x, y, z' 
 '-x, -y, z' 
 'x+1/4, -y+1/4, z+1/4' 
 '-x+1/4, y+1/4, z+1/4' 
 'x, y+1/2, z+1/2' 
 '-x, -y+1/2, z+1/2' 
 'x+1/4, -y+3/4, z+3/4' 
 '-x+1/4, y+3/4, z+3/4' 
 'x+1/2, y, z+1/2' 
 '-x+1/2, -y, z+1/2' 
 'x+3/4, -y+1/4, z+3/4' 
 '-x+3/4, y+1/4, z+3/4' 
 'x+1/2, y+1/2, z' 
 '-x+1/2, -y+1/2, z' 
 'x+3/4, -y+3/4, z+1/4' 
 '-x+3/4, y+3/4, z+1/4' 
 
_cell_length_a                    39.596(7) 
_cell_length_b                    8.2984(14) 
_cell_length_c                    11.258(2) 
_cell_angle_alpha                 90.00 
_cell_angle_beta                  90.00 
_cell_angle_gamma                 90.00 
_cell_volume                      3699.1(11) 
_cell_formula_units_Z             8 
_cell_measurement_temperature     293(2) 
_cell_measurement_reflns_used     1810 
_cell_measurement_theta_min       2.06 
_cell_measurement_theta_max       28.35 
  
_exptl_crystal_description        block 
_exptl_crystal_colour             colourless 
_exptl_crystal_size_max           0.13 
_exptl_crystal_size_mid           0.11 
_exptl_crystal_size_min           0.09 
_exptl_crystal_density_meas       none 
_exptl_crystal_density_diffrn     4.602 
_exptl_crystal_density_method     'not measured' 
_exptl_crystal_F_000              4544 
_exptl_absorpt_coefficient_mu     12.056 
_exptl_absorpt_correction_type    empirical 
_exptl_absorpt_correction_T_min   0.1956 
_exptl_absorpt_correction_T_max   0.3384 
_exptl_absorpt_process_details    SADABS 
 
_exptl_special_details 
; 
 ? 
; 
 
_diffrn_ambient_temperature       293(2) 
_diffrn_radiation_wavelength      0.71073 
_diffrn_radiation_type            MoK\a 
_diffrn_radiation_source          'fine-focus sealed tube' 
_diffrn_radiation_monochromator   graphite 
_diffrn_measurement_device_type   'CCD area detector' 
_diffrn_measurement_method        'phi and omega scans' 
_diffrn_detector_area_resol_mean  '9.00cm' 
_diffrn_standards_number          none 
_diffrn_standards_interval_count  none 
_diffrn_standards_interval_time   none 
_diffrn_standards_decay_%         none 
_diffrn_reflns_number             6467 
_diffrn_reflns_av_R_equivalents   0.0696 
_diffrn_reflns_av_sigmaI/netI     0.0457 
_diffrn_reflns_limit_h_min        -47 
_diffrn_reflns_limit_h_max        52 
_diffrn_reflns_limit_k_min        -11 
_diffrn_reflns_limit_k_max        11 
_diffrn_reflns_limit_l_min        -8 
_diffrn_reflns_limit_l_max        14 
_diffrn_reflns_theta_min          2.06 
_diffrn_reflns_theta_max          28.35 
_reflns_number_total              1810 
_reflns_number_gt                 1738 
_reflns_threshold_expression      >2sigma(I) 
 
_computing_data_collection        'Bruker SMART' 
_computing_cell_refinement        'Bruker SMART' 
_computing_data_reduction         'Bruker SAINT' 
_computing_structure_solution     'SHELXS-97 (Sheldrick, 1990)' 
_computing_structure_refinement   'SHELXL-97 (Sheldrick, 1997)' 
_computing_molecular_graphics     'SHELXP-97' 
_computing_publication_material   'SHELXTL'
 
_refine_special_details 
; 
 Refinement of F^2^ against ALL reflections.  The weighted R-factor wR and 
 goodness of fit S are based on F^2^, conventional R-factors R are based 
 on F, with F set to zero for negative F^2^. The threshold expression of 
 F^2^ > 2sigma(F^2^) is used only for calculating R-factors(gt) etc. and is 
 not relevant to the choice of reflections for refinement.  R-factors based 
 on F^2^ are statistically about twice as large as those based on F, and R- 
 factors based on ALL data will be even larger. 
; 
 
_refine_ls_structure_factor_coef  Fsqd  
_refine_ls_matrix_type            full 
_refine_ls_weighting_scheme       calc  
_refine_ls_weighting_details 
 'calc w=1/[\s^2^(Fo^2^)+(0.0263P)^2^+0.0000P] where P=(Fo^2^+2Fc^2^)/3' 
_atom_sites_solution_primary      direct 
_atom_sites_solution_secondary    difmap 
_atom_sites_solution_hydrogens    . 
_refine_ls_hydrogen_treatment     . 
_refine_ls_extinction_method      SHELXL 
_refine_ls_extinction_coef        0.000268(10) 
_refine_ls_extinction_expression 
 'Fc^*^=kFc[1+0.001xFc^2^\l^3^/sin(2\q)]^-1/4^' 
_refine_ls_abs_structure_details 
 'Flack H D (1983), Acta Cryst. A39, 876-881' 
_refine_ls_abs_structure_Flack    0.98(5) 
_refine_ls_number_reflns          1810 
_refine_ls_number_parameters      130 
_refine_ls_number_restraints      1 
_refine_ls_R_factor_all           0.0270 
_refine_ls_R_factor_gt            0.0249 
_refine_ls_wR_factor_ref          0.0523 
_refine_ls_wR_factor_gt           0.0518 
_refine_ls_goodness_of_fit_ref    1.071 
_refine_ls_restrained_S_all       1.071 
_refine_ls_shift/su_max           0.003 
_refine_ls_shift/su_mean          0.000 
 
loop_ 
 _atom_site_label 
 _atom_site_type_symbol 
 _atom_site_fract_x 
 _atom_site_fract_y 
 _atom_site_fract_z 
 _atom_site_U_iso_or_equiv 
 _atom_site_adp_type 
 _atom_site_occupancy 
 _atom_site_symmetry_multiplicity 
 _atom_site_calc_flag 
 _atom_site_refinement_flags 
 _atom_site_disorder_assembly 
 _atom_site_disorder_group 
In1 In 1.0000 1.0000 0.90449(11) 0.01065(12) Uani 1 2 d S . . 
I1 I 0.952416(10) 1.20155(4) 0.66146(3) 0.01160(13) Uani 1 1 d . . . 
I2 I 0.906775(9) 0.90566(4) 0.90853(6) 0.01134(10) Uani 1 1 d . . . 
I3 I 0.951327(10) 1.20280(4) 1.14770(4) 0.01140(12) Uani 1 1 d . . . 
K1 K 0.90177(3) 0.94305(17) 0.3998(3) 0.0218(3) Uani 1 1 d . . . 
K2 K 1.0000 1.0000 0.4034(5) 0.0286(4) Uani 1 2 d S . . 
O1 O 0.98744(12) 1.1762(6) 0.7680(5) 0.0171(11) Uani 1 1 d . . . 
O2 O 0.95294(8) 0.8815(5) 0.9043(6) 0.0174(8) Uani 1 1 d . . . 
O3 O 0.98604(12) 1.1780(6) 1.0385(5) 0.0179(11) Uani 1 1 d . . . 
O4 O 0.95420(14) 1.0153(6) 0.5795(5) 0.0208(12) Uani 1 1 d . . . 
O5 O 0.91839(13) 1.1618(7) 0.7632(5) 0.0198(10) Uani 1 1 d . . . 
O6 O 0.89929(13) 0.7571(7) 0.7954(5) 0.0225(12) Uani 1 1 d . . . 
O7 O 0.90107(12) 0.7793(7) 1.0372(6) 0.0229(12) Uani 1 1 d . . . 
O8 O 0.95392(13) 1.0155(6) 1.2292(5) 0.0175(11) Uani 1 1 d . . . 
O9 O 0.91633(12) 1.1654(7) 1.0495(5) 0.0204(11) Uani 1 1 d . . . 
 
loop_ 
 _atom_site_aniso_label 
 _atom_site_aniso_U_11 
 _atom_site_aniso_U_22 
 _atom_site_aniso_U_33 
 _atom_site_aniso_U_23 
 _atom_site_aniso_U_13 
 _atom_site_aniso_U_12 
In1 0.0098(2) 0.0108(2) 0.0114(3) 0.000 0.000 -0.0007(2) 
I1 0.01122(17) 0.01122(17) 0.0123(3) 0.0013(2) 0.0008(3) 0.00033(11) 
I2 0.00947(16) 0.01178(16) 0.01278(19) 0.0001(3) -0.0007(2) 0.00030(14) 
I3 0.01149(17) 0.01121(17) 0.0115(3) -0.0014(2) 0.0005(2) 0.00053(11) 
K1 0.0194(7) 0.0237(7) 0.0223(10) 0.0013(11) 0.0050(11) 0.0018(5) 
K2 0.0192(9) 0.0486(13) 0.0179(10) 0.000 0.000 -0.0005(9) 
O1 0.018(2) 0.021(3) 0.013(2) 0.005(2) -0.004(2) -0.0002(19) 
O2 0.0070(17) 0.0166(19) 0.029(2) 0.002(2) -0.001(2) -0.0030(14) 
O3 0.017(2) 0.018(3) 0.018(3) -0.005(2) 0.005(2) 0.002(2) 
O4 0.027(3) 0.013(3) 0.022(3) -0.005(2) 0.005(2) -0.001(2) 
O5 0.020(2) 0.020(2) 0.019(2) 0.006(2) 0.006(2) 0.000(2) 
O6 0.021(3) 0.019(3) 0.028(3) -0.013(2) -0.002(2) 0.000(2) 
O7 0.012(2) 0.029(3) 0.028(3) 0.012(2) 0.001(2) -0.002(2) 
O8 0.022(3) 0.011(2) 0.019(3) 0.003(2) -0.001(2) 0.0020(19) 
O9 0.018(2) 0.025(3) 0.019(3) -0.006(2) -0.006(2) 0.005(2) 
 
_geom_special_details 
; 
 All esds (except the esd in the dihedral angle between two l.s. planes) 
 are estimated using the full covariance matrix.  The cell esds are taken 
 into account individually in the estimation of esds in distances, angles 
 and torsion angles; correlations between esds in cell parameters are only 
 used when they are defined by crystal symmetry.  An approximate (isotropic) 
 treatment of cell esds is used for estimating esds involving l.s. planes. 
; 
 
loop_ 
 _geom_bond_atom_site_label_1 
 _geom_bond_atom_site_label_2 
 _geom_bond_distance 
 _geom_bond_site_symmetry_2 
 _geom_bond_publ_flag 
In1 O2 2.107(4) 2_775 ? 
In1 O2 2.107(4) . ? 
In1 O1 2.179(5) 2_775 ? 
In1 O1 2.179(5) . ? 
In1 O3 2.182(5) 2_775 ? 
In1 O3 2.182(5) . ? 
In1 K2 4.1492(7) 5_545 ? 
In1 K2 4.1492(7) 5 ? 
I1 O5 1.799(5) . ? 
I1 O4 1.802(5) . ? 
I1 O1 1.846(5) . ? 
I1 K2 3.845(4) . ? 
I1 K1 3.903(3) 5 ? 
I2 O6 1.797(5) . ? 
I2 O7 1.802(6) . ? 
I2 O2 1.839(3) . ? 
I2 K1 3.8453(16) 5_545 ? 
I3 O9 1.800(5) . ? 
I3 O8 1.808(5) . ? 
I3 O3 1.856(5) . ? 
I3 K2 3.851(4) 1_556 ? 
I3 K1 3.951(3) 5 ? 
I3 K1 4.068(3) 1_556 ? 
I3 K1 4.0831(16) 12_655 ? 
K1 O6 2.656(6) 12_654 ? 
K1 O6 2.861(7) 5_554 ? 
K1 O5 2.871(7) 5_544 ? 
K1 O8 2.883(7) 1_554 ? 
K1 O9 2.913(6) 5_544 ? 
K1 O9 2.932(6) 16_644 ? 
K1 O4 2.960(7) . ? 
K1 O7 3.190(7) 5_554 ? 
K1 I2 3.8453(16) 5_554 ? 
K1 I1 3.903(3) 5_544 ? 
K1 K2 3.9184(15) . ? 
K1 I3 3.951(3) 5_544 ? 
K2 O8 2.682(8) 1_554 ? 
K2 O8 2.682(8) 2_774 ? 
K2 O4 2.689(8) 2_775 ? 
K2 O4 2.689(8) . ? 
K2 O3 3.124(6) 6_774 ? 
K2 O3 3.124(6) 5_544 ? 
K2 O1 3.129(6) 5_544 ? 
K2 O1 3.129(6) 6_774 ? 
K2 I1 3.845(4) 2_775 ? 
K2 I3 3.851(4) 2_774 ? 
K2 I3 3.851(4) 1_554 ? 
O1 K2 3.129(6) 5 ? 
O3 K2 3.124(6) 5 ? 
O5 K1 2.871(7) 5 ? 
O6 K1 2.656(6) 16_645 ? 
O6 K1 2.861(7) 5_545 ? 
O7 K1 3.190(7) 5_545 ? 
O8 K2 2.682(8) 1_556 ? 
O8 K1 2.883(7) 1_556 ? 
O9 K1 2.913(6) 5 ? 
O9 K1 2.932(6) 12_655 ? 
 
loop_ 
 _geom_angle_atom_site_label_1 
 _geom_angle_atom_site_label_2 
 _geom_angle_atom_site_label_3 
 _geom_angle 
 _geom_angle_site_symmetry_1 
 _geom_angle_site_symmetry_3 
 _geom_angle_publ_flag 
O2 In1 O2 179.9(4) 2_775 . ? 
O2 In1 O1 96.4(2) 2_775 2_775 ? 
O2 In1 O1 83.6(2) . 2_775 ? 
O2 In1 O1 83.6(2) 2_775 . ? 
O2 In1 O1 96.4(2) . . ? 
O1 In1 O1 90.3(3) 2_775 . ? 
O2 In1 O3 95.3(2) 2_775 2_775 ? 
O2 In1 O3 84.8(2) . 2_775 ? 
O1 In1 O3 88.58(15) 2_775 2_775 ? 
O1 In1 O3 178.3(2) . 2_775 ? 
O2 In1 O3 84.8(2) 2_775 . ? 
O2 In1 O3 95.3(2) . . ? 
O1 In1 O3 178.3(2) 2_775 . ? 
O1 In1 O3 88.58(15) . . ? 
O3 In1 O3 92.6(3) 2_775 . ? 
O2 In1 K2 117.83(11) 2_775 5_545 ? 
O2 In1 K2 62.17(11) . 5_545 ? 
O1 In1 K2 47.68(17) 2_775 5_545 ? 
O1 In1 K2 132.00(15) . 5_545 ? 
O3 In1 K2 47.56(17) 2_775 5_545 ? 
O3 In1 K2 132.76(15) . 5_545 ? 
O2 In1 K2 62.17(11) 2_775 5 ? 
O2 In1 K2 117.83(11) . 5 ? 
O1 In1 K2 132.00(15) 2_775 5 ? 
O1 In1 K2 47.68(17) . 5 ? 
O3 In1 K2 132.76(15) 2_775 5 ? 
O3 In1 K2 47.56(17) . 5 ? 
K2 In1 K2 179.66(14) 5_545 5 ? 
O5 I1 O4 101.4(3) . . ? 
O5 I1 O1 97.4(2) . . ? 
O4 I1 O1 101.9(3) . . ? 
O5 I1 K2 140.21(19) . . ? 
O4 I1 K2 38.79(18) . . ? 
O1 I1 K2 94.20(19) . . ? 
O5 I1 K1 43.24(19) . 5 ? 
O4 I1 K1 144.37(17) . 5 ? 
O1 I1 K1 89.88(17) . 5 ? 
K2 I1 K1 173.89(7) . 5 ? 
O6 I2 O7 98.6(3) . . ? 
O6 I2 O2 94.1(2) . . ? 
O7 I2 O2 94.7(2) . . ? 
O6 I2 K1 44.7(2) . 5_545 ? 
O7 I2 K1 55.5(2) . 5_545 ? 
O2 I2 K1 86.65(13) . 5_545 ? 
O9 I3 O8 101.9(3) . . ? 
O9 I3 O3 98.3(3) . . ? 
O8 I3 O3 101.5(2) . . ? 
O9 I3 K2 140.26(19) . 1_556 ? 
O8 I3 K2 38.43(18) . 1_556 ? 
O3 I3 K2 94.37(19) . 1_556 ? 
O9 I3 K1 43.19(19) . 5 ? 
O8 I3 K1 145.13(17) . 5 ? 
O3 I3 K1 87.46(17) . 5 ? 
K2 I3 K1 175.46(7) 1_556 5 ? 
O9 I3 K1 88.03(19) . 1_556 ? 
O8 I3 K1 38.54(18) . 1_556 ? 
O3 I3 K1 139.53(16) . 1_556 ? 
K2 I3 K1 59.23(5) 1_556 1_556 ? 
K1 I3 K1 121.36(4) 5 1_556 ? 
O9 I3 K1 39.67(19) . 12_655 ? 
O8 I3 K1 92.10(17) . 12_655 ? 
O3 I3 K1 137.91(18) . 12_655 ? 
K2 I3 K1 119.16(7) 1_556 12_655 ? 
K1 I3 K1 61.16(3) 5 12_655 ? 
K1 I3 K1 60.21(3) 1_556 12_655 ? 
O6 K1 O6 92.58(17) 12_654 5_554 ? 
O6 K1 O5 131.88(17) 12_654 5_544 ? 
O6 K1 O5 121.9(2) 5_554 5_544 ? 
O6 K1 O8 156.10(17) 12_654 1_554 ? 
O6 K1 O8 63.96(15) 5_554 1_554 ? 
O5 K1 O8 69.43(16) 5_544 1_554 ? 
O6 K1 O9 87.2(2) 12_654 5_544 ? 
O6 K1 O9 164.87(19) 5_554 5_544 ? 
O5 K1 O9 67.76(12) 5_544 5_544 ? 
O8 K1 O9 114.12(15) 1_554 5_544 ? 
O6 K1 O9 63.47(15) 12_654 16_644 ? 
O6 K1 O9 83.20(17) 5_554 16_644 ? 
O5 K1 O9 86.62(18) 5_544 16_644 ? 
O8 K1 O9 114.7(2) 1_554 16_644 ? 
O9 K1 O9 110.05(17) 5_544 16_644 ? 
O6 K1 O4 94.1(2) 12_654 . ? 
O6 K1 O4 96.91(15) 5_554 . ? 
O5 K1 O4 111.70(15) 5_544 . ? 
O8 K1 O4 84.87(12) 1_554 . ? 
O9 K1 O4 68.03(16) 5_544 . ? 
O9 K1 O4 157.5(2) 16_644 . ? 
O6 K1 O7 61.27(16) 12_654 5_554 ? 
O6 K1 O7 53.27(14) 5_554 5_554 ? 
O5 K1 O7 166.53(14) 5_544 5_554 ? 
O8 K1 O7 98.43(14) 1_554 5_554 ? 
O9 K1 O7 114.4(2) 5_544 5_554 ? 
O9 K1 O7 104.31(14) 16_644 5_554 ? 
O4 K1 O7 59.85(15) . 5_554 ? 
O6 K1 I2 79.84(14) 12_654 5_554 ? 
O6 K1 I2 26.20(11) 5_554 5_554 ? 
O5 K1 I2 144.43(15) 5_544 5_554 ? 
O8 K1 I2 76.82(10) 1_554 5_554 ? 
O9 K1 I2 139.89(16) 5_544 5_554 ? 
O9 K1 I2 97.78(12) 16_644 5_554 ? 
O4 K1 I2 75.18(11) . 5_554 ? 
O7 K1 I2 27.73(10) 5_554 5_554 ? 
O6 K1 I1 156.62(13) 12_654 5_544 ? 
O6 K1 I1 101.71(15) 5_554 5_544 ? 
O5 K1 I1 25.42(11) 5_544 5_544 ? 
O8 K1 I1 44.05(11) 1_554 5_544 ? 
O9 K1 I1 83.68(12) 5_544 5_544 ? 
O9 K1 I1 99.65(14) 16_644 5_544 ? 
O4 K1 I1 102.32(11) . 5_544 ? 
O7 K1 I1 141.87(10) 5_554 5_544 ? 
I2 K1 I1 120.24(6) 5_554 5_544 ? 
O6 K1 K2 136.46(15) 12_654 . ? 
O6 K1 K2 85.90(11) 5_554 . ? 
O5 K1 K2 82.88(11) 5_544 . ? 
O8 K1 K2 43.19(15) 1_554 . ? 
O9 K1 K2 83.86(11) 5_544 . ? 
O9 K1 K2 157.86(15) 16_644 . ? 
O4 K1 K2 43.30(15) . . ? 
O7 K1 K2 84.15(10) 5_554 . ? 
I2 K1 K2 80.10(3) 5_554 . ? 
I1 K1 K2 63.84(6) 5_544 . ? 
O6 K1 I3 92.47(16) 12_654 5_544 ? 
O6 K1 I3 140.08(13) 5_554 5_544 ? 
O5 K1 I3 81.62(12) 5_544 5_544 ? 
O8 K1 I3 102.71(11) 1_554 5_544 ? 
O9 K1 I3 25.02(10) 5_544 5_544 ? 
O9 K1 I3 133.56(13) 16_644 5_544 ? 
O4 K1 I3 43.21(11) . 5_544 ? 
O7 K1 I3 95.93(14) 5_554 5_544 ? 
I2 K1 I3 117.39(7) 5_554 5_544 ? 
I1 K1 I3 88.36(3) 5_544 5_544 ? 
K2 K1 I3 63.93(6) . 5_544 ? 
O8 K2 O8 86.0(3) 1_554 2_774 ? 
O8 K2 O4 179.5(3) 1_554 2_775 ? 
O8 K2 O4 94.47(13) 2_774 2_775 ? 
O8 K2 O4 94.47(13) 1_554 . ? 
O8 K2 O4 179.5(3) 2_774 . ? 
O4 K2 O4 85.0(3) 2_775 . ? 
O8 K2 O3 115.81(15) 1_554 6_774 ? 
O8 K2 O3 106.05(14) 2_774 6_774 ? 
O4 K2 O3 64.04(18) 2_775 6_774 ? 
O4 K2 O3 73.8(2) . 6_774 ? 
O8 K2 O3 106.05(14) 1_554 5_544 ? 
O8 K2 O3 115.81(15) 2_774 5_544 ? 
O4 K2 O3 73.8(2) 2_775 5_544 ? 
O4 K2 O3 64.04(18) . 5_544 ? 
O3 K2 O3 121.8(3) 6_774 5_544 ? 
O8 K2 O1 64.96(17) 1_554 5_544 ? 
O8 K2 O1 73.18(18) 2_774 5_544 ? 
O4 K2 O1 115.20(15) 2_775 5_544 ? 
O4 K2 O1 107.00(15) . 5_544 ? 
O3 K2 O1 178.95(15) 6_774 5_544 ? 
O3 K2 O1 58.29(11) 5_544 5_544 ? 
O8 K2 O1 73.18(19) 1_554 6_774 ? 
O8 K2 O1 64.96(17) 2_774 6_774 ? 
O4 K2 O1 107.00(15) 2_775 6_774 ? 
O4 K2 O1 115.20(15) . 6_774 ? 
O3 K2 O1 58.29(11) 6_774 6_774 ? 
O3 K2 O1 178.95(15) 5_544 6_774 ? 
O1 K2 O1 121.7(3) 5_544 6_774 ? 
O8 K2 I1 155.05(11) 1_554 2_775 ? 
O8 K2 I1 101.43(13) 2_774 2_775 ? 
O4 K2 I1 24.82(11) 2_775 2_775 ? 
O4 K2 I1 78.1(2) . 2_775 ? 
O3 K2 I1 85.28(16) 6_774 2_775 ? 
O3 K2 I1 49.23(12) 5_544 2_775 ? 
O1 K2 I1 94.15(11) 5_544 2_775 ? 
O1 K2 I1 131.58(12) 6_774 2_775 ? 
O8 K2 I1 101.43(13) 1_554 . ? 
O8 K2 I1 155.05(11) 2_774 . ? 
O4 K2 I1 78.1(2) 2_775 . ? 
O4 K2 I1 24.82(11) . . ? 
O3 K2 I1 49.23(12) 6_774 . ? 
O3 K2 I1 85.28(16) 5_544 . ? 
O1 K2 I1 131.58(12) 5_544 . ? 
O1 K2 I1 94.15(11) 6_774 . ? 
I1 K2 I1 81.87(11) 2_775 . ? 
O8 K2 I3 79.33(19) 1_554 2_774 ? 
O8 K2 I3 24.77(11) 2_774 2_774 ? 
O4 K2 I3 101.12(13) 2_775 2_774 ? 
O4 K2 I3 155.35(11) . 2_774 ? 
O3 K2 I3 130.47(12) 6_774 2_774 ? 
O3 K2 I3 94.51(11) 5_544 2_774 ? 
O1 K2 I3 48.71(12) 5_544 2_774 ? 
O1 K2 I3 86.08(15) 6_774 2_774 ? 
I1 K2 I3 97.437(14) 2_775 2_774 ? 
I1 K2 I3 179.24(10) . 2_774 ? 
O8 K2 I3 24.77(11) 1_554 1_554 ? 
O8 K2 I3 79.33(19) 2_774 1_554 ? 
O4 K2 I3 155.35(11) 2_775 1_554 ? 
O4 K2 I3 101.12(13) . 1_554 ? 
O3 K2 I3 94.51(11) 6_774 1_554 ? 
O3 K2 I3 130.47(12) 5_544 1_554 ? 
O1 K2 I3 86.08(15) 5_544 1_554 ? 
O1 K2 I3 48.71(12) 6_774 1_554 ? 
I1 K2 I3 179.24(10) 2_775 1_554 ? 
I1 K2 I3 97.437(14) . 1_554 ? 
I3 K2 I3 83.26(11) 2_774 1_554 ? 
I1 O1 In1 134.9(3) . . ? 
I1 O1 K2 109.8(2) . 5 ? 
In1 O1 K2 101.3(2) . 5 ? 
I2 O2 In1 145.9(2) . . ? 
I3 O3 In1 136.1(3) . . ? 
I3 O3 K2 111.0(2) . 5 ? 
In1 O3 K2 101.4(2) . 5 ? 
I1 O4 K2 116.4(2) . . ? 
I1 O4 K1 119.8(2) . . ? 
K2 O4 K1 87.7(2) . . ? 
I1 O5 K1 111.3(2) . 5 ? 
I2 O6 K1 134.4(3) . 16_645 ? 
I2 O6 K1 109.2(3) . 5_545 ? 
K1 O6 K1 95.58(17) 16_645 5_545 ? 
I2 O7 K1 96.8(3) . 5_545 ? 
I3 O8 K2 116.8(2) . 1_556 ? 
I3 O8 K1 118.5(2) . 1_556 ? 
K2 O8 K1 89.4(2) 1_556 1_556 ? 
I3 O9 K1 111.8(2) . 5 ? 
I3 O9 K1 117.3(3) . 12_655 ? 
K1 O9 K1 88.79(15) 5 12_655 ? 
 
_diffrn_measured_fraction_theta_max    0.999 
_diffrn_reflns_theta_full              28.35 
_diffrn_measured_fraction_theta_full   0.999 
_refine_diff_density_max    1.038 
_refine_diff_density_min   -0.848 
_refine_diff_density_rms    0.220 
#===========================================END
data_compound 2
 
_audit_creation_method            SHELXL-97 
_chemical_name_systematic 
; 
 ? 
; 
_chemical_name_common             ? 
_chemical_melting_point           'not measured' 
_chemical_formula_moiety          'I6 In K3 O18' 
_chemical_formula_sum 
 'I6 In K3 O18' 
_chemical_formula_weight          1281.52 
 
loop_ 
 _atom_type_symbol 
 _atom_type_description 
 _atom_type_scat_dispersion_real 
 _atom_type_scat_dispersion_imag 
 _atom_type_scat_source 
 'I'  'I'  -0.4742   1.8119 
 'International Tables Vol C Tables 4.2.6.8 and 6.1.1.4' 
 'In'  'In'  -0.7276   1.3100 
 'International Tables Vol C Tables 4.2.6.8 and 6.1.1.4' 
 'K'  'K'   0.2009   0.2494 
 'International Tables Vol C Tables 4.2.6.8 and 6.1.1.4' 
 'O'  'O'   0.0106   0.0060 
 'International Tables Vol C Tables 4.2.6.8 and 6.1.1.4' 
 
_symmetry_cell_setting            triclinic
_symmetry_space_group_name_H-M    p-1
_symmetry_space_group_name_Hall   -P1 
 
loop_ 
 _symmetry_equiv_pos_as_xyz 
 'x, y, z' 
 '-x, -y, -z' 
 
_cell_length_a                    6.9441(14) 
_cell_length_b                    7.0685(14) 
_cell_length_c                    10.639(2) 
_cell_angle_alpha                 98.14(3) 
_cell_angle_beta                  108.77(3) 
_cell_angle_gamma                 102.72(3) 
_cell_volume                      469.37(20) 
_cell_formula_units_Z             1 
_cell_measurement_temperature     293(2) 
_cell_measurement_reflns_used     2089 
_cell_measurement_theta_min       3.04 
_cell_measurement_theta_max       27.41 
 
_exptl_crystal_description        block
_exptl_crystal_colour             colourless
_exptl_crystal_size_max           0.11
_exptl_crystal_size_mid           0.10 
_exptl_crystal_size_min           0.07
_exptl_crystal_density_meas       none
_exptl_crystal_density_diffrn     4.534 
_exptl_crystal_density_method     'not measured' 
_exptl_crystal_F_000              568 
_exptl_absorpt_coefficient_mu     11.877 
_exptl_absorpt_correction_type    empirical 
_exptl_absorpt_correction_T_min   0.2853 
_exptl_absorpt_correction_T_max   0.4353 
_exptl_absorpt_process_details    'Process-auto'
 
_exptl_special_details 
; 
 ? 
; 
 
_diffrn_ambient_temperature       293(2) 
_diffrn_radiation_wavelength      0.71073 
_diffrn_radiation_type            MoK\a 
_diffrn_radiation_source          'fine-focus sealed tube' 
_diffrn_radiation_monochromator   graphite 
_diffrn_measurement_device_type   'Rigaku RAXIS-RAPID' 
_diffrn_measurement_method        omega-scan 
_diffrn_detector_area_resol_mean  '10.0' 
_diffrn_standards_number          0 
_diffrn_standards_interval_count  0 
_diffrn_standards_interval_time   0 
_diffrn_standards_decay_%         0  
_diffrn_reflns_number             4566 
_diffrn_reflns_av_R_equivalents   0.0693 
_diffrn_reflns_av_sigmaI/netI     0.0919 
_diffrn_reflns_limit_h_min        -8 
_diffrn_reflns_limit_h_max        8 
_diffrn_reflns_limit_k_min        -9 
_diffrn_reflns_limit_k_max        9 
_diffrn_reflns_limit_l_min        -13 
_diffrn_reflns_limit_l_max        13 
_diffrn_reflns_theta_min          3.04 
_diffrn_reflns_theta_max          27.40 
_reflns_number_total              2093 
_reflns_number_gt                 1662 
_reflns_threshold_expression      >2sigma(I) 
 
_computing_data_collection        'Process-auto' 
_computing_cell_refinement        'Process-auto' 
_computing_data_reduction         'Process-auto'
_computing_structure_solution     'SHELXS-97 (Sheldrick, 1990)' 
_computing_structure_refinement   'SHELXL-97 (Sheldrick, 1997)' 
_computing_molecular_graphics     ? 
_computing_publication_material   ? 
 
_refine_special_details 
; 
 Refinement of F^2^ against ALL reflections.  The weighted R-factor wR and 
 goodness of fit S are based on F^2^, conventional R-factors R are based 
 on F, with F set to zero for negative F^2^. The threshold expression of 
 F^2^ > 2sigma(F^2^) is used only for calculating R-factors(gt) etc. and is 
 not relevant to the choice of reflections for refinement.  R-factors based 
 on F^2^ are statistically about twice as large as those based on F, and R- 
 factors based on ALL data will be even larger. 
; 
 
_refine_ls_structure_factor_coef  Fsqd  
_refine_ls_matrix_type            full 
_refine_ls_weighting_scheme       calc  
_refine_ls_weighting_details 
 'calc w=1/[\s^2^(Fo^2^)+(0.0000P)^2^+3.3433P] where P=(Fo^2^+2Fc^2^)/3' 
_atom_sites_solution_primary      direct 
_atom_sites_solution_secondary    difmap 
_atom_sites_solution_hydrogens    . 
_refine_ls_hydrogen_treatment     . 
_refine_ls_extinction_method      none 
_refine_ls_extinction_coef        ? 
_refine_ls_number_reflns          2093 
_refine_ls_number_parameters      130 
_refine_ls_number_restraints      6 
_refine_ls_R_factor_all           0.0547 
_refine_ls_R_factor_gt            0.0435 
_refine_ls_wR_factor_ref          0.1161 
_refine_ls_wR_factor_gt           0.0944 
_refine_ls_goodness_of_fit_ref    1.173 
_refine_ls_restrained_S_all       1.172 
_refine_ls_shift/su_max           0.000 
_refine_ls_shift/su_mean          0.000 
 
loop_ 
 _atom_site_label 
 _atom_site_type_symbol 
 _atom_site_fract_x 
 _atom_site_fract_y 
 _atom_site_fract_z 
 _atom_site_U_iso_or_equiv 
 _atom_site_adp_type 
 _atom_site_occupancy 
 _atom_site_symmetry_multiplicity 
 _atom_site_calc_flag 
 _atom_site_refinement_flags 
 _atom_site_disorder_assembly 
 _atom_site_disorder_group 
I1 I 0.28519(9) 0.53414(9) 0.10138(6) 0.01141(18) Uani 1 1 d . . . 
I2 I 1.05791(9) 1.03427(9) 0.19324(6) 0.01028(18) Uani 1 1 d . . . 
I3 I 0.63570(9) 1.05901(9) 0.37891(6) 0.01035(19) Uani 1 1 d . . . 
In1 In 0.5000 1.0000 0.0000 0.0098(2) Uani 1 2 d S . . 
O1 O 0.3876(10) 0.6793(10) -0.0055(7) 0.0171(15) Uani 1 1 d U . . 
O2 O 0.8124(9) 0.9642(10) 0.0395(6) 0.0125(14) Uani 1 1 d . . . 
O3 O 0.5540(11) 1.1121(11) 0.2084(7) 0.0190(16) Uani 1 1 d . . . 
O4 O 0.4972(11) 0.6426(11) 0.2633(7) 0.0207(16) Uani 1 1 d . . . 
O5 O 0.0909(11) 0.6546(10) 0.1219(7) 0.0194(16) Uani 1 1 d . . . 
O6 O 0.9407(10) 0.9631(11) 0.3147(7) 0.0198(17) Uani 1 1 d . . . 
O7 O 1.1102(11) 1.3020(10) 0.2354(8) 0.0202(16) Uani 1 1 d . . . 
O8 O 0.7974(11) 1.3079(10) 0.4718(7) 0.0180(16) Uani 1 1 d . . . 
O9 O 0.3886(10) 1.0801(11) 0.4023(7) 0.0167(15) Uani 1 1 d . . . 
K1 K 0.8751(3) 0.5374(3) 0.2932(2) 0.0170(5) Uani 1 1 d . . . 
K2 K 0.5000 0.5000 0.5000 0.0236(7) Uani 1 2 d S . . 
 
loop_ 
 _atom_site_aniso_label 
 _atom_site_aniso_U_11 
 _atom_site_aniso_U_22 
 _atom_site_aniso_U_33 
 _atom_site_aniso_U_23 
 _atom_site_aniso_U_13 
 _atom_site_aniso_U_12 
I1 0.0113(3) 0.0092(3) 0.0123(3) 0.0035(3) 0.0032(3) 0.0013(3) 
I2 0.0098(3) 0.0093(3) 0.0118(3) 0.0034(3) 0.0035(3) 0.0029(2) 
I3 0.0116(3) 0.0111(3) 0.0089(3) 0.0021(2) 0.0042(3) 0.0039(2) 
In1 0.0109(5) 0.0094(5) 0.0091(5) 0.0023(4) 0.0036(4) 0.0025(4) 
O1 0.0179(17) 0.0168(17) 0.0168(17) 0.0053(10) 0.0072(11) 0.0033(10) 
O2 0.004(3) 0.018(4) 0.013(3) 0.000(3) 0.000(3) 0.004(3) 
O3 0.026(4) 0.018(4) 0.012(3) 0.008(3) 0.003(3) 0.007(3) 
O4 0.023(4) 0.020(4) 0.010(3) 0.002(3) -0.003(3) 0.000(3) 
O5 0.022(4) 0.009(4) 0.028(4) 0.006(3) 0.010(3) 0.005(3) 
O6 0.019(4) 0.025(5) 0.024(4) 0.011(4) 0.015(3) 0.010(3) 
O7 0.020(3) 0.011(4) 0.030(4) 0.008(3) 0.004(3) 0.009(3) 
O8 0.024(4) 0.011(4) 0.016(4) -0.004(3) 0.011(3) -0.002(3) 
O9 0.020(4) 0.023(4) 0.011(3) 0.001(3) 0.009(3) 0.010(3) 
K1 0.0201(11) 0.0170(12) 0.0155(11) 0.0021(9) 0.0086(10) 0.0066(9) 
K2 0.0318(18) 0.0226(19) 0.0234(17) 0.0064(15) 0.0127(16) 0.0171(15) 
 
_geom_special_details 
; 
 All esds (except the esd in the dihedral angle between two l.s. planes) 
 are estimated using the full covariance matrix.  The cell esds are taken 
 into account individually in the estimation of esds in distances, angles 
 and torsion angles; correlations between esds in cell parameters are only 
 used when they are defined by crystal symmetry.  An approximate (isotropic) 
 treatment of cell esds is used for estimating esds involving l.s. planes. 
; 
 
loop_ 
 _geom_bond_atom_site_label_1 
 _geom_bond_atom_site_label_2 
 _geom_bond_distance 
 _geom_bond_site_symmetry_2 
 _geom_bond_publ_flag 
I1 O4 1.794(7) . ? 
I1 O5 1.799(7) . ? 
I1 O1 1.839(6) . ? 
I2 O6 1.807(6) . ? 
I2 O7 1.807(7) . ? 
I2 O2 1.852(6) . ? 
I2 O9 2.551(7) 1_655 ? 
I3 O8 1.805(7) . ? 
I3 O3 1.838(6) . ? 
I3 O9 1.846(7) . ? 
In1 O3 2.127(7) 2_675 ? 
In1 O3 2.127(7) . ? 
In1 O2 2.152(6) 2_675 ? 
In1 O2 2.152(6) . ? 
In1 O1 2.215(7) . ? 
In1 O1 2.215(7) 2_675 ? 
O9 I2 2.551(7) 1_455 ? 
 
loop_ 
 _geom_angle_atom_site_label_1 
 _geom_angle_atom_site_label_2 
 _geom_angle_atom_site_label_3 
 _geom_angle 
 _geom_angle_site_symmetry_1 
 _geom_angle_site_symmetry_3 
 _geom_angle_publ_flag 
O4 I1 O5 100.6(3) . . ? 
O4 I1 O1 99.8(3) . . ? 
O5 I1 O1 100.5(3) . . ? 
O6 I2 O7 101.2(3) . . ? 
O6 I2 O2 98.6(3) . . ? 
O7 I2 O2 100.9(3) . . ? 
O6 I2 O9 79.0(3) . 1_655 ? 
O7 I2 O9 86.8(3) . 1_655 ? 
O2 I2 O9 172.2(3) . 1_655 ? 
O8 I3 O3 97.1(3) . . ? 
O8 I3 O9 97.2(3) . . ? 
O3 I3 O9 93.2(3) . . ? 
O3 In1 O3 180.0(4) 2_675 . ? 
O3 In1 O2 94.8(3) 2_675 2_675 ? 
O3 In1 O2 85.2(3) . 2_675 ? 
O3 In1 O2 85.2(3) 2_675 . ? 
O3 In1 O2 94.8(3) . . ? 
O2 In1 O2 180.000(1) 2_675 . ? 
O3 In1 O1 82.5(3) 2_675 . ? 
O3 In1 O1 97.5(3) . . ? 
O2 In1 O1 92.1(2) 2_675 . ? 
O2 In1 O1 87.9(2) . . ? 
O3 In1 O1 97.5(3) 2_675 2_675 ? 
O3 In1 O1 82.5(3) . 2_675 ? 
O2 In1 O1 87.9(2) 2_675 2_675 ? 
O2 In1 O1 92.1(2) . 2_675 ? 
O1 In1 O1 180.000(1) . 2_675 ? 
I1 O1 In1 135.6(4) . . ? 
I2 O2 In1 134.1(4) . . ? 
I3 O3 In1 143.9(4) . . ? 
I3 O9 I2 119.3(3) . 1_455 ? 
 
_diffrn_measured_fraction_theta_max    0.983 
_diffrn_reflns_theta_full              27.40 
_diffrn_measured_fraction_theta_full   0.983 
_refine_diff_density_max    1.762 
_refine_diff_density_min   -2.756 
_refine_diff_density_rms    0.485 
#===========================================END
data_compound3
 
_audit_creation_method            SHELXL-97 
_chemical_name_systematic 
; 
 ? 
; 
_chemical_name_common             ? 
_chemical_melting_point           'not measured' 
_chemical_formula_moiety          'H3 I2 In O8' 
_chemical_formula_sum 
 'H3 I2 In O8' 
_chemical_formula_weight          499.64 
 
loop_ 
 _atom_type_symbol 
 _atom_type_description 
 _atom_type_scat_dispersion_real 
 _atom_type_scat_dispersion_imag 
 _atom_type_scat_source 
 'O'  'O'   0.0106   0.0060 
 'International Tables Vol C Tables 4.2.6.8 and 6.1.1.4' 
 'H'  'H'   0.0000   0.0000 
 'International Tables Vol C Tables 4.2.6.8 and 6.1.1.4' 
 'In'  'In'  -0.7276   1.3100 
 'International Tables Vol C Tables 4.2.6.8 and 6.1.1.4' 
 'I'  'I'  -0.4742   1.8119 
 'International Tables Vol C Tables 4.2.6.8 and 6.1.1.4' 
 
_symmetry_cell_setting            triclinic
_symmetry_space_group_name_H-M    P-1 
_symmetry_space_group_name_Hall   -P1
 
loop_ 
 _symmetry_equiv_pos_as_xyz 
 'x, y, z' 
 '-x, -y, -z' 
 
_cell_length_a                    6.7321(13) 
_cell_length_b                    7.5255(15) 
_cell_length_c                    7.6798(15) 
_cell_angle_alpha                 100.43(3) 
_cell_angle_beta                  91.96(3) 
_cell_angle_gamma                 106.64(3) 
_cell_volume                      365.09(12) 
_cell_formula_units_Z             2 
_cell_measurement_temperature     293(2) 
_cell_measurement_reflns_used     1613 
_cell_measurement_theta_min       3.17 
_cell_measurement_theta_max       27.45 
 
_exptl_crystal_description        block
_exptl_crystal_colour             colourless 
_exptl_crystal_size_max           0.18 
_exptl_crystal_size_mid           0.12 
_exptl_crystal_size_min           0.09 
_exptl_crystal_density_meas       none
_exptl_crystal_density_diffrn     4.545 
_exptl_crystal_density_method     'not measured' 
_exptl_crystal_F_000              444 
_exptl_absorpt_coefficient_mu     11.697 
_exptl_absorpt_correction_type    empirical 
_exptl_absorpt_correction_T_min   0.1948 
_exptl_absorpt_correction_T_max   0.3481 
_exptl_absorpt_process_details    'Process-auto'
 
_exptl_special_details 
; 
 ? 
; 
 
_diffrn_ambient_temperature       293(2) 
_diffrn_radiation_wavelength      0.71073 
_diffrn_radiation_type            MoK\a 
_diffrn_radiation_source          'fine-focus sealed tube' 
_diffrn_radiation_monochromator   graphite 
_diffrn_measurement_device_type   'Rigaku RAXIS-RAPID' 
_diffrn_measurement_method        'omega scan'   
_diffrn_detector_area_resol_mean  '10.0' 
_diffrn_standards_number          none
_diffrn_standards_interval_count  none 
_diffrn_standards_interval_time   none 
_diffrn_standards_decay_%         none 
_diffrn_reflns_number             3522 
_diffrn_reflns_av_R_equivalents   0.0199 
_diffrn_reflns_av_sigmaI/netI     0.0249 
_diffrn_reflns_limit_h_min        -8 
_diffrn_reflns_limit_h_max        8 
_diffrn_reflns_limit_k_min        -9 
_diffrn_reflns_limit_k_max        9 
_diffrn_reflns_limit_l_min        -9 
_diffrn_reflns_limit_l_max        9 
_diffrn_reflns_theta_min          3.17 
_diffrn_reflns_theta_max          27.45 
_reflns_number_total              1613
_reflns_number_gt                 1490 
_reflns_threshold_expression      >2sigma(I) 
 
_computing_data_collection        'Process-auto'
_computing_cell_refinement        'Process-auto'
_computing_data_reduction         'Process-auto'
_computing_structure_solution     'SHELXS-97 (Sheldrick, 1990)' 
_computing_structure_refinement   'SHELXL-97 (Sheldrick, 1997)' 
_computing_molecular_graphics     'SHELXP-97' 
_computing_publication_material   'SHELXTL-97'
 
_refine_special_details 
; 
 Refinement of F^2^ against ALL reflections.  The weighted R-factor wR and 
 goodness of fit S are based on F^2^, conventional R-factors R are based 
 on F, with F set to zero for negative F^2^. The threshold expression of 
 F^2^ > 2sigma(F^2^) is used only for calculating R-factors(gt) etc. and is 
 not relevant to the choice of reflections for refinement.  R-factors based 
 on F^2^ are statistically about twice as large as those based on F, and R- 
 factors based on ALL data will be even larger. 
; 
 
_refine_ls_structure_factor_coef  Fsqd  
_refine_ls_matrix_type            full 
_refine_ls_weighting_scheme       calc  
_refine_ls_weighting_details 
 'calc w=1/[\s^2^(Fo^2^)+(0.0173P)^2^+1.8269P] where P=(Fo^2^+2Fc^2^)/3' 
_atom_sites_solution_primary      direct 
_atom_sites_solution_secondary    difmap 
_atom_sites_solution_hydrogens    geom 
_refine_ls_hydrogen_treatment     mixed 
_refine_ls_extinction_method      SHELXL 
_refine_ls_extinction_coef        0.0092(5) 
_refine_ls_extinction_expression 
 'Fc^*^=kFc[1+0.001xFc^2^\l^3^/sin(2\q)]^-1/4^' 
_refine_ls_number_reflns          1613 
_refine_ls_number_parameters      116 
_refine_ls_number_restraints      3 
_refine_ls_R_factor_all           0.0187 
_refine_ls_R_factor_gt            0.0159 
_refine_ls_wR_factor_ref          0.0536 
_refine_ls_wR_factor_gt           0.0371 
_refine_ls_goodness_of_fit_ref    1.237 
_refine_ls_restrained_S_all       1.236 
_refine_ls_shift/su_max           0.000 
_refine_ls_shift/su_mean          0.000 
 
loop_ 
 _atom_site_label 
 _atom_site_type_symbol 
 _atom_site_fract_x 
 _atom_site_fract_y 
 _atom_site_fract_z 
 _atom_site_U_iso_or_equiv 
 _atom_site_adp_type 
 _atom_site_occupancy 
 _atom_site_symmetry_multiplicity 
 _atom_site_calc_flag 
 _atom_site_refinement_flags 
 _atom_site_disorder_assembly 
 _atom_site_disorder_group 
In1 In 0.0000 0.0000 -0.5000 0.00994(13) Uani 1 2 d S . . 
In2 In 0.0000 0.0000 0.0000 0.00938(12) Uani 1 2 d S . . 
I1 I -0.28419(5) -0.42735(4) -0.83061(4) 0.01221(11) Uani 1 1 d . . . 
I2 I 0.47391(5) 0.02421(4) 0.26011(4) 0.01062(11) Uani 1 1 d . . . 
O1 O 0.0416(6) -0.1018(6) -0.2683(5) 0.0141(7) Uani 1 1 d . . . 
H1 H -0.012(11) -0.207(11) -0.290(10) 0.021(18) Uiso 1 1 d . . . 
O2 O -0.1905(6) -0.2808(6) -0.6140(5) 0.0202(8) Uani 1 1 d . . . 
O3 O 0.2868(6) -0.0616(5) -0.5836(5) 0.0157(7) Uani 1 1 d . . . 
O4 O 0.2999(6) -0.0375(6) 0.0574(5) 0.0219(9) Uani 1 1 d . . . 
O5 O -0.1247(7) -0.2882(5) 0.0293(5) 0.0233(9) Uani 1 1 d . . . 
O6 O -0.5216(6) -0.3659(6) -0.8556(6) 0.0204(8) Uani 1 1 d . . . 
O7 O 0.5202(7) 0.2730(6) 0.3170(6) 0.0285(10) Uani 1 1 d . . . 
O1W O 0.1006(8) -0.5116(7) -0.6795(7) 0.0354(11) Uani 1 1 d D . . 
H1A H 0.194(10) -0.497(15) -0.751(9) 0.07(4) Uiso 1 1 d D . . 
H1B H 0.148(13) -0.448(13) -0.576(5) 0.07(3) Uiso 1 1 d D . . 
 
loop_ 
 _atom_site_aniso_label 
 _atom_site_aniso_U_11 
 _atom_site_aniso_U_22 
 _atom_site_aniso_U_33 
 _atom_site_aniso_U_23 
 _atom_site_aniso_U_13 
 _atom_site_aniso_U_12 
In1 0.0081(2) 0.0147(2) 0.0064(2) 0.00259(17) 0.00033(17) 0.00221(18) 
In2 0.0088(2) 0.0126(2) 0.0067(2) 0.00327(17) 0.00072(16) 0.00223(17) 
I1 0.01405(17) 0.00947(17) 0.01107(17) 0.00212(12) 0.00067(12) 0.00033(12) 
I2 0.00903(16) 0.01382(17) 0.00950(17) 0.00373(11) 0.00142(11) 0.00322(12) 
O1 0.0205(18) 0.0129(19) 0.0081(16) 0.0027(13) -0.0014(14) 0.0036(15) 
O2 0.0219(19) 0.020(2) 0.0129(18) 0.0004(15) -0.0005(15) -0.0013(16) 
O3 0.0175(18) 0.0191(19) 0.0134(17) 0.0069(14) 0.0025(14) 0.0075(15) 
O4 0.0156(18) 0.041(3) 0.0113(18) 0.0056(17) -0.0007(15) 0.0120(17) 
O5 0.038(2) 0.0126(19) 0.0160(19) 0.0056(15) 0.0074(17) 0.0008(17) 
O6 0.0112(17) 0.024(2) 0.026(2) 0.0021(16) 0.0017(15) 0.0059(15) 
O7 0.040(3) 0.015(2) 0.029(2) 0.0074(17) 0.011(2) 0.0050(18) 
O1W 0.047(3) 0.022(2) 0.032(3) 0.001(2) 0.014(2) 0.004(2) 
 
_geom_special_details 
; 
 All esds (except the esd in the dihedral angle between two l.s. planes) 
 are estimated using the full covariance matrix.  The cell esds are taken 
 into account individually in the estimation of esds in distances, angles 
 and torsion angles; correlations between esds in cell parameters are only 
 used when they are defined by crystal symmetry.  An approximate (isotropic) 
 treatment of cell esds is used for estimating esds involving l.s. planes. 
; 
 
loop_ 
 _geom_bond_atom_site_label_1 
 _geom_bond_atom_site_label_2 
 _geom_bond_distance 
 _geom_bond_site_symmetry_2 
 _geom_bond_publ_flag 
In1 O1 2.101(4) . ? 
In1 O1 2.101(4) 2_554 ? 
In1 O2 2.140(4) 2_554 ? 
In1 O2 2.140(4) . ? 
In1 O3 2.201(4) 2_554 ? 
In1 O3 2.201(4) . ? 
In2 O1 2.122(4) 2 ? 
In2 O1 2.122(4) . ? 
In2 O5 2.146(4) . ? 
In2 O5 2.146(4) 2 ? 
In2 O4 2.159(4) 2 ? 
In2 O4 2.159(4) . ? 
I1 O6 1.800(4) . ? 
I1 O2 1.802(4) . ? 
I1 O5 1.803(4) 1_554 ? 
I2 O7 1.776(4) . ? 
I2 O4 1.820(4) . ? 
I2 O3 1.834(4) 1_556 ? 
O1 H1 0.75(8) . ? 
O3 I2 1.834(4) 1_554 ? 
O5 I1 1.803(4) 1_556 ? 
O1W H1A 0.85(2) . ? 
O1W H1B 0.85(2) . ? 
 
loop_ 
 _geom_angle_atom_site_label_1 
 _geom_angle_atom_site_label_2 
 _geom_angle_atom_site_label_3 
 _geom_angle 
 _geom_angle_site_symmetry_1 
 _geom_angle_site_symmetry_3 
 _geom_angle_publ_flag 
O1 In1 O1 180.000(1) . 2_554 ? 
O1 In1 O2 93.01(15) . 2_554 ? 
O1 In1 O2 86.99(15) 2_554 2_554 ? 
O1 In1 O2 86.99(15) . . ? 
O1 In1 O2 93.01(15) 2_554 . ? 
O2 In1 O2 180.0(2) 2_554 . ? 
O1 In1 O3 92.03(14) . 2_554 ? 
O1 In1 O3 87.97(14) 2_554 2_554 ? 
O2 In1 O3 92.74(16) 2_554 2_554 ? 
O2 In1 O3 87.26(16) . 2_554 ? 
O1 In1 O3 87.97(14) . . ? 
O1 In1 O3 92.03(14) 2_554 . ? 
O2 In1 O3 87.26(16) 2_554 . ? 
O2 In1 O3 92.74(16) . . ? 
O3 In1 O3 180.000(1) 2_554 . ? 
O1 In2 O1 180.00(8) 2 . ? 
O1 In2 O5 91.43(15) 2 . ? 
O1 In2 O5 88.57(15) . . ? 
O1 In2 O5 88.57(15) 2 2 ? 
O1 In2 O5 91.43(15) . 2 ? 
O5 In2 O5 180.0(3) . 2 ? 
O1 In2 O4 84.58(15) 2 2 ? 
O1 In2 O4 95.42(15) . 2 ? 
O5 In2 O4 94.77(17) . 2 ? 
O5 In2 O4 85.23(17) 2 2 ? 
O1 In2 O4 95.42(15) 2 . ? 
O1 In2 O4 84.58(15) . . ? 
O5 In2 O4 85.23(17) . . ? 
O5 In2 O4 94.77(17) 2 . ? 
O4 In2 O4 180.0(2) 2 . ? 
O6 I1 O2 97.14(19) . . ? 
O6 I1 O5 100.9(2) . 1_554 ? 
O2 I1 O5 101.09(18) . 1_554 ? 
O7 I2 O4 101.5(2) . . ? 
O7 I2 O3 102.31(19) . 1_556 ? 
O4 I2 O3 99.96(17) . 1_556 ? 
In1 O1 In2 130.8(2) . . ? 
In1 O1 H1 106(5) . . ? 
In2 O1 H1 108(6) . . ? 
I1 O2 In1 138.9(2) . . ? 
I2 O3 In1 133.80(19) 1_554 . ? 
I2 O4 In2 132.7(2) . . ? 
I1 O5 In2 140.8(2) 1_556 . ? 
H1A O1W H1B 111(4) . . ? 
 
loop_ 
 _geom_hbond_atom_site_label_D 
 _geom_hbond_atom_site_label_H 
 _geom_hbond_atom_site_label_A 
 _geom_hbond_distance_DH 
 _geom_hbond_distance_HA 
 _geom_hbond_distance_DA 
 _geom_hbond_angle_DHA 
 _geom_hbond_site_symmetry_A 
O1 H1 O1W  0.75(8) 2.00(8) 2.738(6) 168(7) 2_544 
O1W H1A O6  0.85(2) 2.14(4) 2.945(7) 158(8) 1_655 
O1W H1A O5  0.85(2) 2.38(8) 2.866(7) 117(7) 2_544 
O1W H1A I1  0.85(2) 3.27(5) 3.989(5) 145(7) 2_543 
O1W H1B O1W  0.85(2) 2.63(7) 3.111(10) 117(7) 2_544 
 
_diffrn_measured_fraction_theta_max    0.970 
_diffrn_reflns_theta_full              27.45 
_diffrn_measured_fraction_theta_full   0.970 
_refine_diff_density_max    1.105 
_refine_diff_density_min   -0.829 
_refine_diff_density_rms    0.240 
#===========================================END
data_compound4
 
_audit_creation_method            SHELXL-97 
_chemical_name_systematic 
; 
 ? 
; 
_chemical_name_common             ? 
_chemical_melting_point           'not measured' 
_chemical_formula_moiety          'I3 In O9' 
_chemical_formula_sum 
 'I3 In O9' 
_chemical_formula_weight          639.52 
 
loop_ 
 _atom_type_symbol 
 _atom_type_description 
 _atom_type_scat_dispersion_real 
 _atom_type_scat_dispersion_imag 
 _atom_type_scat_source 
 'O'  'O'   0.0106   0.0060 
 'International Tables Vol C Tables 4.2.6.8 and 6.1.1.4' 
 'In'  'In'  -0.7276   1.3100 
 'International Tables Vol C Tables 4.2.6.8 and 6.1.1.4' 
 'I'  'I'  -0.4742   1.8119 
 'International Tables Vol C Tables 4.2.6.8 and 6.1.1.4' 
 
_symmetry_cell_setting            Hexagonal 
_symmetry_space_group_name_H-M    R-3
_symmetry_space_group_name_Hall   -R3 
 
loop_ 
 _symmetry_equiv_pos_as_xyz 
 'x, y, z' 
 '-y, x-y, z' 
 '-x+y, -x, z' 
 'x+2/3, y+1/3, z+1/3' 
 '-y+2/3, x-y+1/3, z+1/3' 
 '-x+y+2/3, -x+1/3, z+1/3' 
 'x+1/3, y+2/3, z+2/3' 
 '-y+1/3, x-y+2/3, z+2/3' 
 '-x+y+1/3, -x+2/3, z+2/3' 
 '-x, -y, -z' 
 'y, -x+y, -z' 
 'x-y, x, -z' 
 '-x+2/3, -y+1/3, -z+1/3' 
 'y+2/3, -x+y+1/3, -z+1/3' 
 'x-y+2/3, x+1/3, -z+1/3' 
 '-x+1/3, -y+2/3, -z+2/3' 
 'y+1/3, -x+y+2/3, -z+2/3' 
 'x-y+1/3, x+2/3, -z+2/3' 
 
_cell_length_a                    9.7701(14) 
_cell_length_b                    9.7701(14) 
_cell_length_c                    14.179(3) 
_cell_angle_alpha                 90.00 
_cell_angle_beta                  90.00 
_cell_angle_gamma                 120.00 
_cell_volume                      1172.1(3) 
_cell_formula_units_Z             6 
_cell_measurement_temperature     293(2) 
_cell_measurement_reflns_used     582
_cell_measurement_theta_min       4.31
_cell_measurement_theta_max       27.45  
 
_exptl_crystal_description        block
_exptl_crystal_colour             colourless 
_exptl_crystal_size_max           0.07 
_exptl_crystal_size_mid           0.03 
_exptl_crystal_size_min           0.03 
_exptl_crystal_density_meas       none 
_exptl_crystal_density_diffrn     5.436 
_exptl_crystal_density_method     'not measured' 
_exptl_crystal_F_000              1680 
_exptl_absorpt_coefficient_mu     14.903 
_exptl_absorpt_correction_type    empirical
_exptl_absorpt_correction_T_min   0.3588 
_exptl_absorpt_correction_T_max   0.6391 
_exptl_absorpt_process_details    'Process-auto'
 
_exptl_special_details 
; 
 ? 
; 
 
_diffrn_ambient_temperature       293(2) 
_diffrn_radiation_wavelength      0.71073 
_diffrn_radiation_type            MoK\a 
_diffrn_radiation_source          'fine-focus sealed tube' 
_diffrn_radiation_monochromator   graphite 
_diffrn_measurement_device_type   'Rigaku RAXIS-RAPID' 
_diffrn_measurement_method        'omega scan'   
_diffrn_detector_area_resol_mean  '10.0' 
_diffrn_standards_number          none
_diffrn_standards_interval_count  none 
_diffrn_standards_interval_time   none 
_diffrn_standards_decay_%         none
_diffrn_reflns_number             3734 
_diffrn_reflns_av_R_equivalents   0.0701 
_diffrn_reflns_av_sigmaI/netI     0.0405 
_diffrn_reflns_limit_h_min        -12 
_diffrn_reflns_limit_h_max        12 
_diffrn_reflns_limit_k_min        -12 
_diffrn_reflns_limit_k_max        12 
_diffrn_reflns_limit_l_min        -18 
_diffrn_reflns_limit_l_max        17 
_diffrn_reflns_theta_min          4.31 
_diffrn_reflns_theta_max          27.45 
_reflns_number_total              582 
_reflns_number_gt                 554 
_reflns_threshold_expression      >2sigma(I) 
 
_computing_data_collection        'Process-auto'
_computing_cell_refinement        'Process-auto'
_computing_data_reduction         'Process-auto'
_computing_structure_solution     'SHELXS-97 (Sheldrick, 1990)' 
_computing_structure_refinement   'SHELXL-97 (Sheldrick, 1997)' 
_computing_molecular_graphics     'SHELXP-97' 
_computing_publication_material   'SHELXTL-97'
 
_refine_special_details 
; 
 Refinement of F^2^ against ALL reflections.  The weighted R-factor wR and 
 goodness of fit S are based on F^2^, conventional R-factors R are based 
 on F, with F set to zero for negative F^2^. The threshold expression of 
 F^2^ > 2sigma(F^2^) is used only for calculating R-factors(gt) etc. and is 
 not relevant to the choice of reflections for refinement.  R-factors based 
 on F^2^ are statistically about twice as large as those based on F, and R- 
 factors based on ALL data will be even larger. 
; 
 
_refine_ls_structure_factor_coef  Fsqd  
_refine_ls_matrix_type            full 
_refine_ls_weighting_scheme       calc  
_refine_ls_weighting_details 
 'calc w=1/[\s^2^(Fo^2^)+(0.0277P)^2^+0.0000P] where P=(Fo^2^+2Fc^2^)/3' 
_atom_sites_solution_primary      direct 
_atom_sites_solution_secondary    difmap 
_atom_sites_solution_hydrogens    . 
_refine_ls_hydrogen_treatment     . 
_refine_ls_extinction_method      SHELXL 
_refine_ls_extinction_coef        0.0056(2) 
_refine_ls_extinction_expression 
 'Fc^*^=kFc[1+0.001xFc^2^\l^3^/sin(2\q)]^-1/4^' 
_refine_ls_number_reflns          582 
_refine_ls_number_parameters      41 
_refine_ls_number_restraints      0 
_refine_ls_R_factor_all           0.0279 
_refine_ls_R_factor_gt            0.0259 
_refine_ls_wR_factor_ref          0.0595 
_refine_ls_wR_factor_gt           0.0585 
_refine_ls_goodness_of_fit_ref    1.184 
_refine_ls_restrained_S_all       1.184 
_refine_ls_shift/su_max           0.000 
_refine_ls_shift/su_mean          0.000 
 
loop_ 
 _atom_site_label 
 _atom_site_type_symbol 
 _atom_site_fract_x 
 _atom_site_fract_y 
 _atom_site_fract_z 
 _atom_site_U_iso_or_equiv 
 _atom_site_adp_type 
 _atom_site_occupancy 
 _atom_site_symmetry_multiplicity 
 _atom_site_calc_flag 
 _atom_site_refinement_flags 
 _atom_site_disorder_assembly 
 _atom_site_disorder_group 
I1 I 0.00405(3) 0.29956(3) 0.08081(2) 0.00698(18) Uani 1 1 d . . . 
In1 In 0.3333 0.6667 -0.01003(4) 0.00555(19) Uani 1 3 d S . . 
O1 O 0.1343(4) 0.5106(4) 0.0750(2) 0.0125(7) Uani 1 1 d . . . 
O2 O 0.1760(4) 0.6942(4) -0.1050(2) 0.0093(7) Uani 1 1 d . . . 
O3 O -0.0269(4) 0.2475(5) -0.0431(3) 0.0179(8) Uani 1 1 d . . . 
 
loop_ 
 _atom_site_aniso_label 
 _atom_site_aniso_U_11 
 _atom_site_aniso_U_22 
 _atom_site_aniso_U_33 
 _atom_site_aniso_U_23 
 _atom_site_aniso_U_13 
 _atom_site_aniso_U_12 
I1 0.0075(2) 0.0080(2) 0.0062(2) 0.00293(10) 0.00269(10) 0.00437(14) 
In1 0.0069(2) 0.0069(2) 0.0028(3) 0.000 0.000 0.00345(11) 
O1 0.0141(17) 0.0102(16) 0.0083(16) 0.0014(14) 0.0022(13) 0.0025(14) 
O2 0.0083(15) 0.0163(18) 0.0050(15) 0.0028(14) 0.0025(13) 0.0075(14) 
O3 0.0158(18) 0.0167(19) 0.0139(18) -0.0114(16) 0.0002(15) 0.0026(15) 
 
_geom_special_details 
; 
 All esds (except the esd in the dihedral angle between two l.s. planes) 
 are estimated using the full covariance matrix.  The cell esds are taken 
 into account individually in the estimation of esds in distances, angles 
 and torsion angles; correlations between esds in cell parameters are only 
 used when they are defined by crystal symmetry.  An approximate (isotropic) 
 treatment of cell esds is used for estimating esds involving l.s. planes. 
; 
 
loop_ 
 _geom_bond_atom_site_label_1 
 _geom_bond_atom_site_label_2 
 _geom_bond_distance 
 _geom_bond_site_symmetry_2 
 _geom_bond_publ_flag 
I1 O1 1.804(3) . ? 
I1 O3 1.811(4) . ? 
I1 O2 1.823(3) 10_565 ? 
In1 O1 2.144(3) 3_565 ? 
In1 O1 2.144(3) . ? 
In1 O1 2.144(3) 2_665 ? 
In1 O2 2.159(3) . ? 
In1 O2 2.159(3) 3_565 ? 
In1 O2 2.159(3) 2_665 ? 
O2 I1 1.823(3) 10_565 ? 
 
loop_ 
 _geom_angle_atom_site_label_1 
 _geom_angle_atom_site_label_2 
 _geom_angle_atom_site_label_3 
 _geom_angle 
 _geom_angle_site_symmetry_1 
 _geom_angle_site_symmetry_3 
 _geom_angle_publ_flag 
O1 I1 O3 101.53(16) . . ? 
O1 I1 O2 96.38(16) . 10_565 ? 
O3 I1 O2 99.40(16) . 10_565 ? 
O1 In1 O1 91.46(13) 3_565 . ? 
O1 In1 O1 91.46(13) 3_565 2_665 ? 
O1 In1 O1 91.46(13) . 2_665 ? 
O1 In1 O2 93.82(12) 3_565 . ? 
O1 In1 O2 89.43(13) . . ? 
O1 In1 O2 174.62(13) 2_665 . ? 
O1 In1 O2 89.43(13) 3_565 3_565 ? 
O1 In1 O2 174.62(13) . 3_565 ? 
O1 In1 O2 93.82(12) 2_665 3_565 ? 
O2 In1 O2 85.21(13) . 3_565 ? 
O1 In1 O2 174.62(13) 3_565 2_665 ? 
O1 In1 O2 93.82(12) . 2_665 ? 
O1 In1 O2 89.43(13) 2_665 2_665 ? 
O2 In1 O2 85.21(13) . 2_665 ? 
O2 In1 O2 85.21(13) 3_565 2_665 ? 
I1 O1 In1 135.2(2) . . ? 
I1 O2 In1 130.22(18) 10_565 . ? 
 
_diffrn_measured_fraction_theta_max    0.965 
_diffrn_reflns_theta_full              27.45 
_diffrn_measured_fraction_theta_full   0.965 
_refine_diff_density_max    1.387 
_refine_diff_density_min   -1.967 
_refine_diff_density_rms    0.314 
#===========================================END
